# Supplementary material for: AMMOS2: a web server for protein–ligand–water complexes refinement via molecular mechanics
Source: PubMed Central journal article supplement — Nucleic Acids Res. 2017 May 9;45(Web Server issue):W350–5. doi: 10.1093/nar/gkx397 (PMC5570140; doi:10.1093/nar/gkx397), 2017-05-09
Supplement: gkx397_Supp.pdf [file gkx397_Supp.pdf]

**Figure 1S.** Protein-ligand interaction energies (in kcal/mol) before and after minimization with AMMOS2 for the best docking pose with different number of water molecules in the binding pocket for thrombin, HIV-1 protease, estrogen receptor, ribonuclease, carboxypeptidase, metalloproteinase. C0 notes the energy of the docked complex before minimization, C1 to C5 correspond to the five cases of protein flexibility. The PDB ID of the proteins are noted.

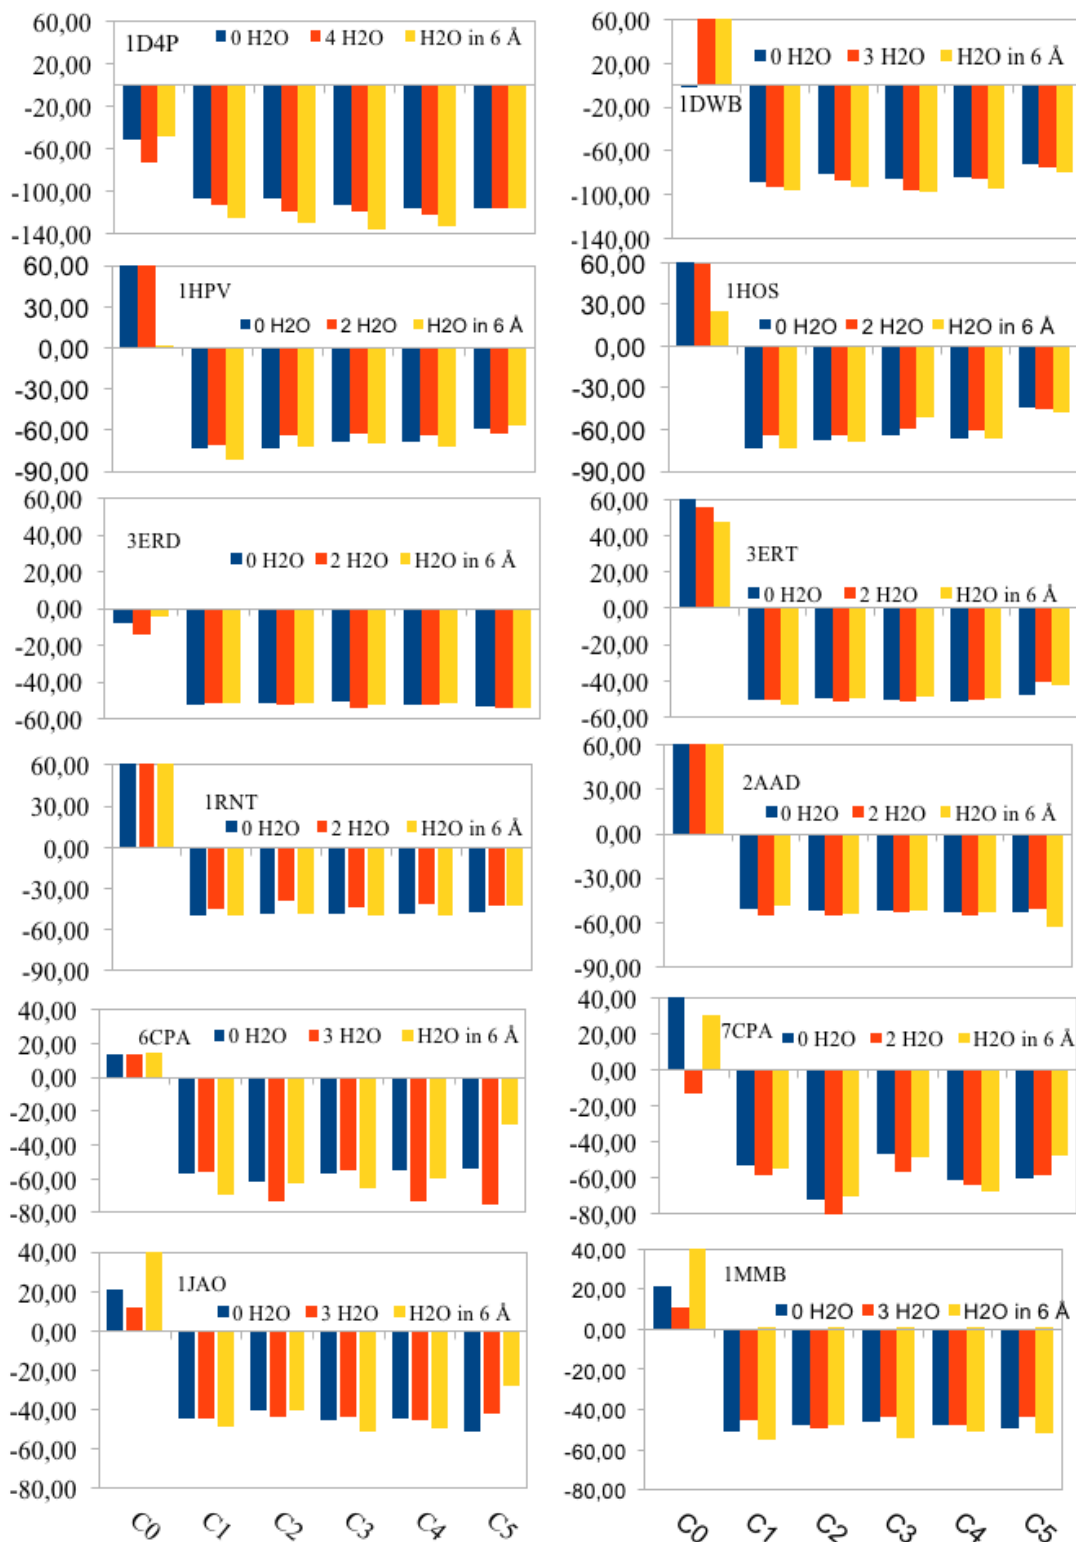

**Figure 2S.** Protein-ligand interaction energies (in kcal/mol) calculated with the AMMOS2 server after docking with AutoDock4.2 (in blue), after minimization with Chimera (in orange) and after minimization with AMMOS2 (in grey) including all water molecules present in the X-ray structures within a distance of 6 Å of the co-crystallized ligand. A. Protein flexibility Case 1; B. Protein flexibility Case 3.

Chimera minimization included 1000 steps of steepest descent optimization and water molecules and metal ions were considered as a part of the receptor. Chimera required about 10 minutes for 1 ligand and full protein flexibility minimization for a protein of typical length (350 residues).

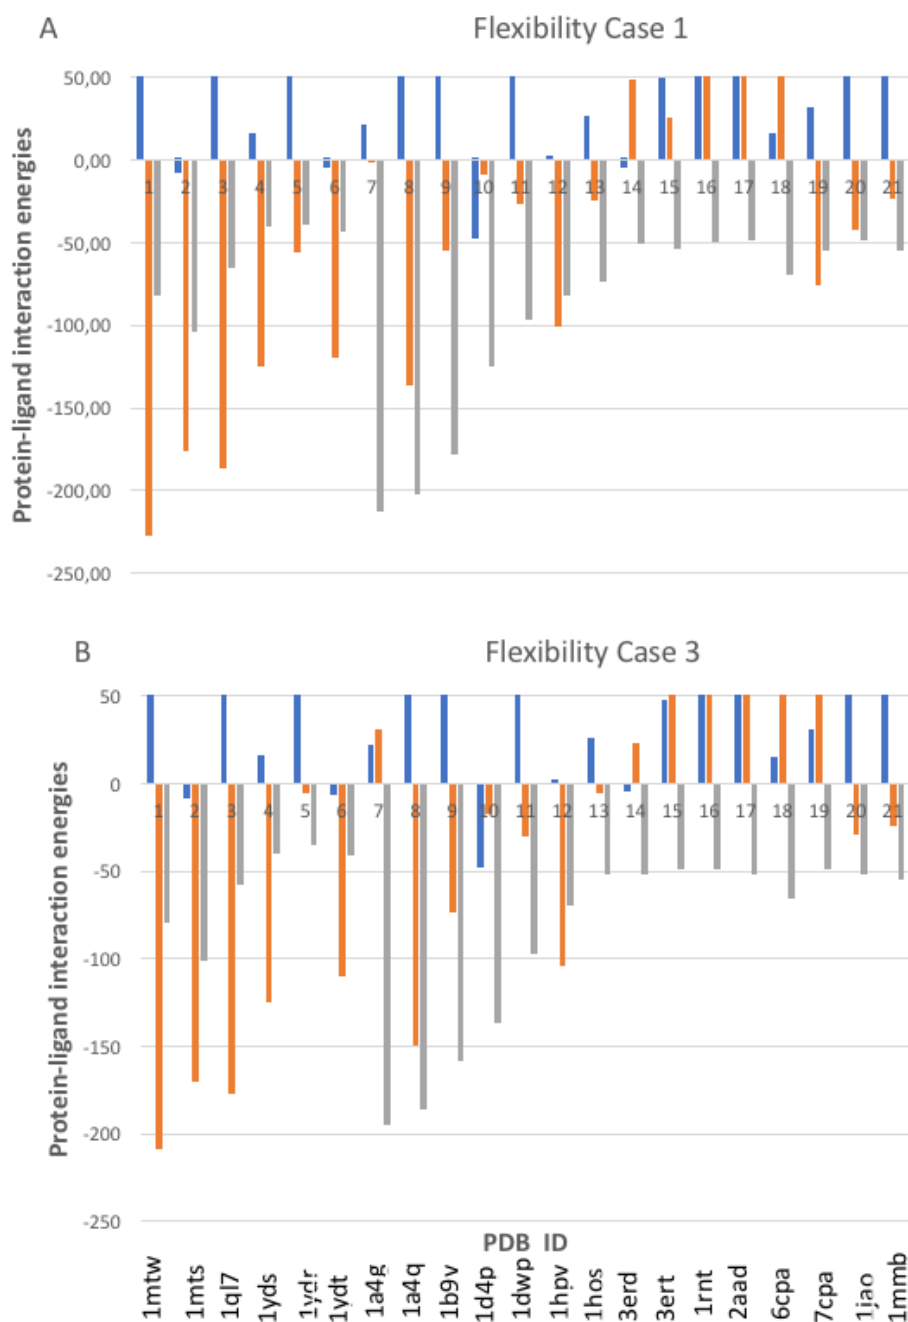

**Figure 3S.** The X-ray structure of the catalytic domain of the matrix metalloproteinase-8 with bound ligand OD3 (PDB ID: 1JAO) (shown in magenta) is compared to the structure of the complex minimized by full atom protein minimization (Case 1) with AMMOS2 (shown in cyan). The ligand and the water molecules present in the binding pocket are shown in sticks. The two  $\text{Ca}^{2+}$  and two  $\text{Zn}^{2+}$  ions are shown as solid spheres.

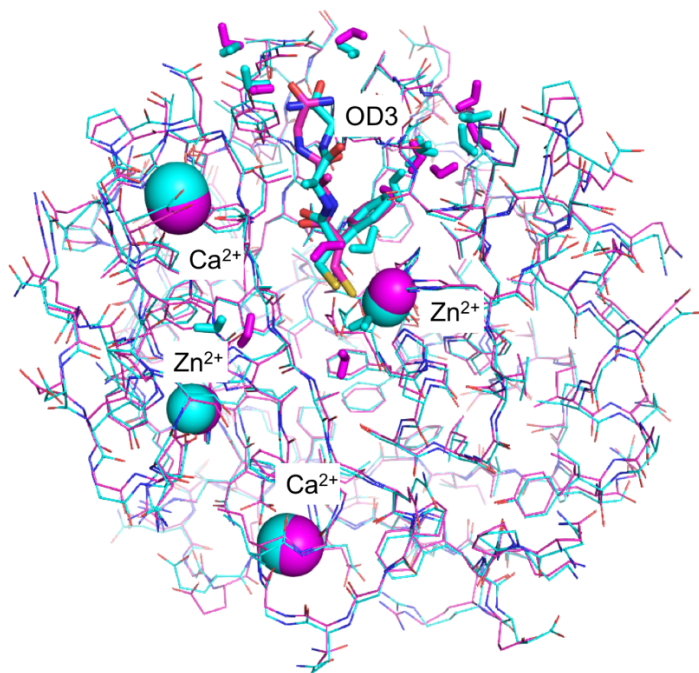

## PDB ID references

### **1a4g, 1a4q**

Taylor, N.R., Cleasby, A., Singh, O., Skarzynski, T., Wonacott, A.J., Smith, P.W., Sollis, S.L., Howes, P.D., Cherry, P.C., Bethell, R., Colman, P. and Varghese, J. (1998) Dihydropyranocarboxamides related to zanamivir: a new series of inhibitors of influenza virus sialidases. 2. Crystallographic and molecular modeling study of complexes of 4-amino-4H-pyran-6-carboxamides and sialidase from influenza virus types A and B. *J Med Chem*, **41**, 798-807.

### **1b9v**

Finley, J.B., Atigadda, V.R., Duarte, F., Zhao, J.J., Brouillette, W.J., Air, G.M. and Luo, M. (1999) Novel aromatic inhibitors of influenza virus neuraminidase make selective interactions with conserved residues and water molecules in the active site. *J Mol Biol*, **293**, 1107-1119.

### **1d4p**

Chirgadze, N.Y., Sall, D.J., Klimkowski, V.J., Clawson, D.K., Briggs, S.L., Hermann, R., Smith, G.F., Gifford-Moore, D.S. and Wery, J.P. (1997) The crystal structure of human alpha-thrombin complexed with LY178550, a nonpeptidyl, active site-directed inhibitor. *Protein Sci*, **6**, 1412-1417.

### **1dwb**

Banner, D.W. and Hadvary, P. (1991) Crystallographic analysis at 3.0-A resolution of the binding to human thrombin of four active site-directed inhibitors. *J Biol Chem*, **266**, 20085-20093.

### **1hos**

Abdel-Meguid, S.S., Zhao, B., Murthy, K.H., Winborne, E., Choi, J.K., DesJarlais, R.L., Minnich, M.D., Culp, J.S., Debouck, C., Tomaszek Jr., T.A., Meek, T.D. and Dreyer, G.B. (1993) Inhibition of human immunodeficiency virus-1 protease by a C2-symmetric phosphinate. Synthesis and crystallographic analysis. *Biochemistry*, **32**, 7972-7980.

### **1hpv**

Kim, E.E., Baker, C.T., Dwyer, M.D., Murcko, M.A., Rao, B.G., Tung, R.D. and Navia, M.A. (1995) Crystal structure of HIV-1 protease in complex with Vx-478, a potent and orally bioavailable inhibitor of the enzyme. *J Am Chem Soc*, **117**, 1181-1182.

### **1jao**

Grams, F., Reinemer, P., Powers, J.C., Kleine, T., Pieper, M., Tschesche, H., Huber, R. and Bode, W. (1995) X-ray structures of human neutrophil collagenase complexed with peptide hydroxamate and peptide thiol inhibitors. Implications for substrate binding and rational drug design. *Eur J Biochem*, **228**, 830-841.

### **1mmb**

Grams, F., Crimmin, M., Hinnes, L., Huxley, P., Pieper, M., Tschesche, H. and Bode, W. (1995) Structure determination and analysis of human neutrophil collagenase complexed with a hydroxamate inhibitor. *Biochemistry*, **34**, 14012-14020.

**1mts, 1mtw**

Stubbs, M.T., Huber, R. and Bode, W. (1995) Crystal structures of factor Xa specific inhibitors in complex with trypsin: structural grounds for inhibition of factor Xa and selectivity against thrombin. *FEBS Lett*, **375**, 103-107.

**1ql7**

Stubbs, M.T., Reyda, S., Dullweber, F., Moeller, M., Klebe, G., Dorsch, D., Mederski, W.W.K.R. and Wurziger, H. (2002) Ph-Dependent binding modes observed in trypsin crystals: lessons for the structure-based drug design. *Chembiochem*, **3**, 246.

**1rnt**

Arni, R., Heinemann, U., Maslowska, M., Tokuoka, R. and Saenger, W. (1987) Restrained least-squares refinement of the crystal structure of the ribonuclease T1(Asterisk)2(Prime)-Guanylic acid complex at 1.9 Angstroms resolution. *Acta Crystallogr Sect B*, **43**, 548.

1ydr, 1yds, 1ydt: Engh, R.A., Girod, A., Kinzel, V., Huber, R. and Bossemeyer, D. (1996) Crystal structures of catalytic subunit of cAMP-dependent protein kinase in complex with isoquinolinesulfonyl protein kinase inhibitors H7, H8, and H89. Structural implications for selectivity. *J Biol Chem*, **271**, 26157-26164.

**2aad**

Zegers, I., Verhelst, P., Choe, H.W., Steyaert, J., Heinemann, U., Saenger, W. and Wyns, L. (1992) Role of histidine-40 in ribonuclease T1 catalysis: three-dimensional structures of the partially active His40Lys mutant. *Biochemistry*, **31**, 11317-11325.

**3erd, 3ert**

Shiau, A.K., Barstad, D., Loria, P.M., Cheng, L., Kushner, P.J., Agard, D.A. and Greene, G.L. (1998) The structural basis of estrogen receptor/coactivator recognition and the antagonism of this interaction by tamoxifen. *Cell (Cambridge Mass)*, **95**, 927-937.

**6cpa**

Kim, H. and Lipscomb, W.N. (1990) Crystal structure of the complex of carboxypeptidase A with a strongly bound phosphonate in a new crystalline form: comparison with structures of other complexes. *Biochemistry*, **29**, 5546-5555.

**7cpa**

Kim, H. and Lipscomb, W.N. (1991) Comparison of the structures of three carboxypeptidase A-phosphonate complexes determined by X-ray crystallography. *Biochemistry*, **30**, 8171-8180.
